# Supplementary material for: Addition of the mammalian target of rapamycin inhibitor, everolimus, to consolidation therapy in acute myeloid leukemia: experience from the UK NCRI AML17 trial
Source: PubMed Central journal article supplement — Haematologica. 2018 Jul 5;103(10):1654–61. doi: 10.3324/haematol.2018.189514 (PMC6165825; doi:10.3324/haematol.2018.189514), 2018-10
Supplement: 2018.189514.BURNETT_SUPPL.pdf [file 2018.189514.BURNETT_SUPPL.pdf]

## Addition of the mammalian target of rapamycin inhibitor, everolimus, to consolidation therapy in acute myeloid leukemia: experience from the UK NCRI AML17 trial

Alan K Burnett,<sup>1</sup> Emma Das Gupta,<sup>2</sup> Steve Knapper,<sup>3</sup> Asim Khwaja,<sup>4</sup> Marion Sweeney,<sup>3</sup> Lars Kjeldsen,<sup>5</sup> Timothy Hawkins,<sup>6</sup> Sophie E Betteridge,<sup>7</sup> Paul Cahalin,<sup>8</sup> Richard E Clark,<sup>9</sup> Robert K Hills<sup>9</sup> and Nigel H Russell<sup>2</sup> on behalf of the UK NCRI AML Study Group

<sup>1</sup>Formerly Department of Haematology, Cardiff University School of Medicine, UK; <sup>2</sup>Department of Haematology, Nottingham University Hospital NHS Trust, UK; <sup>3</sup>Department of Haematology, University Hospital of Wales, Cardiff, UK; <sup>4</sup>University College, London Cancer Institute, UK; <sup>5</sup>Department of Haematology, Rigshospitalet, Copenhagen, Denmark; <sup>6</sup>Department of Haematology, Auckland City Hospital, New Zealand; <sup>7</sup>Centre for Trials Research, Cardiff University School of Medicine, UK; <sup>8</sup>Department of Haematology, Blackpool Victoria Hospital, UK and <sup>9</sup>Department of Haematology, Royal Liverpool University Hospital, UK

©2018 Ferrata Storti Foundation. This is an open-access paper. doi:10.3324/haematol.2018.189514

Received: January 24, 2018.

Accepted: July 4, 2018.

Pre-published: July 5 2018.

Correspondence: akburnett719@gmail.com

---

# Supplemental Figure 1: Randomizations Addressed in AML17

Protocol Version 7

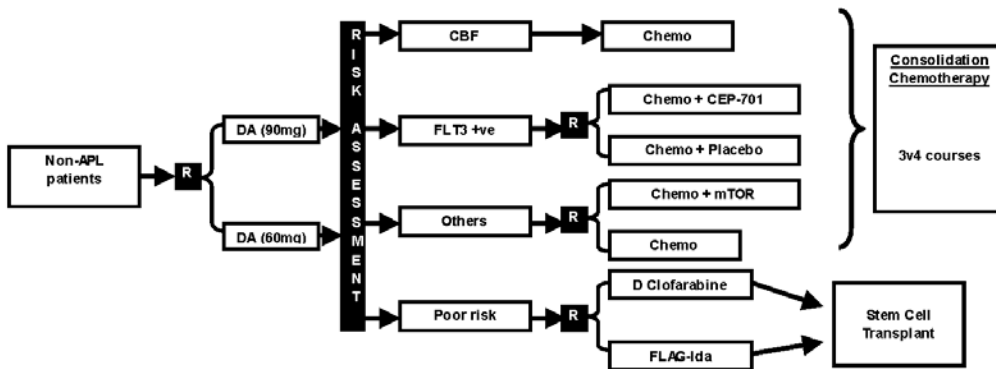

|                                                                                  |
|----------------------------------------------------------------------------------|
| Gemtuzumab Ozogamicin 3mg/m <sup>2</sup> vs 6mg/m <sup>2</sup> (day 1 course 1)  |
| ADE vs DA                                                                        |
| DA (Daunorubicin 90mg/m <sup>2</sup> ) vs DA (Daunorubicin 60mg/m <sup>2</sup> ) |
| Lestaurtinib vs not (FLT3 mutant)                                                |
| Everolimus vs not (courses 2-4)                                                  |
| 3 vs 4 courses in total (if not high risk)                                       |
| FLAG-Ida vs Daunorubicin/Clofarabine                                             |

**Supplementary Figure 2: Plasma Inhibitory activity (PIA) Measurement.**

The protocol requested, with patient agreement, the collection of blood samples pre-dose on day 14 of each course of everolimus treatment. To assess mTOR inhibitory activity, 400µl patient plasma was incubated in triplicate with  $5 \times 10^5$  HEL cells for 1h at 37°C in a humidified incubator with 5%CO<sub>2</sub>. The approach was similar to those reported for other inhibitory assays.<sup>18</sup> A standard curve of phospho-S6 ribosomal protein (pS6-RP) PIA versus everolimus concentration was generated by spiking healthy volunteer plasma with everolimus that produce clinically-relevant concentrations ranging from 1 to 200ng/ml. In this context an estimate of plasma inhibition of phospho-S6 ribosomal protein (p S6-RP) in response to patient plasma was measured in cell lysates by immunoblotting and ELISA. The results were expressed as a percentage reduction of pS6-RP inhibitory activity compared to the maximum inhibition achieved by a 200ng/ml everolimus concentration which was run in parallel along with a no drug control.

**Overall survival from Everolimus randomization: Inhibition at all vs not at all timepoints (1+ timepoints measured)**

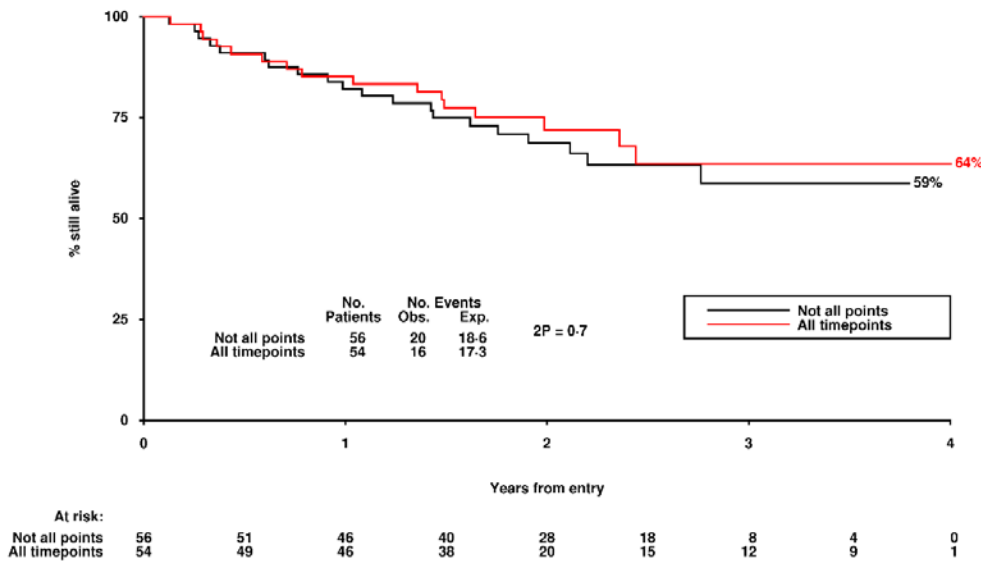

**Supplementary Figure 3: Resolution of Sanger data with AML17 mTOR randomisation (n=124)**

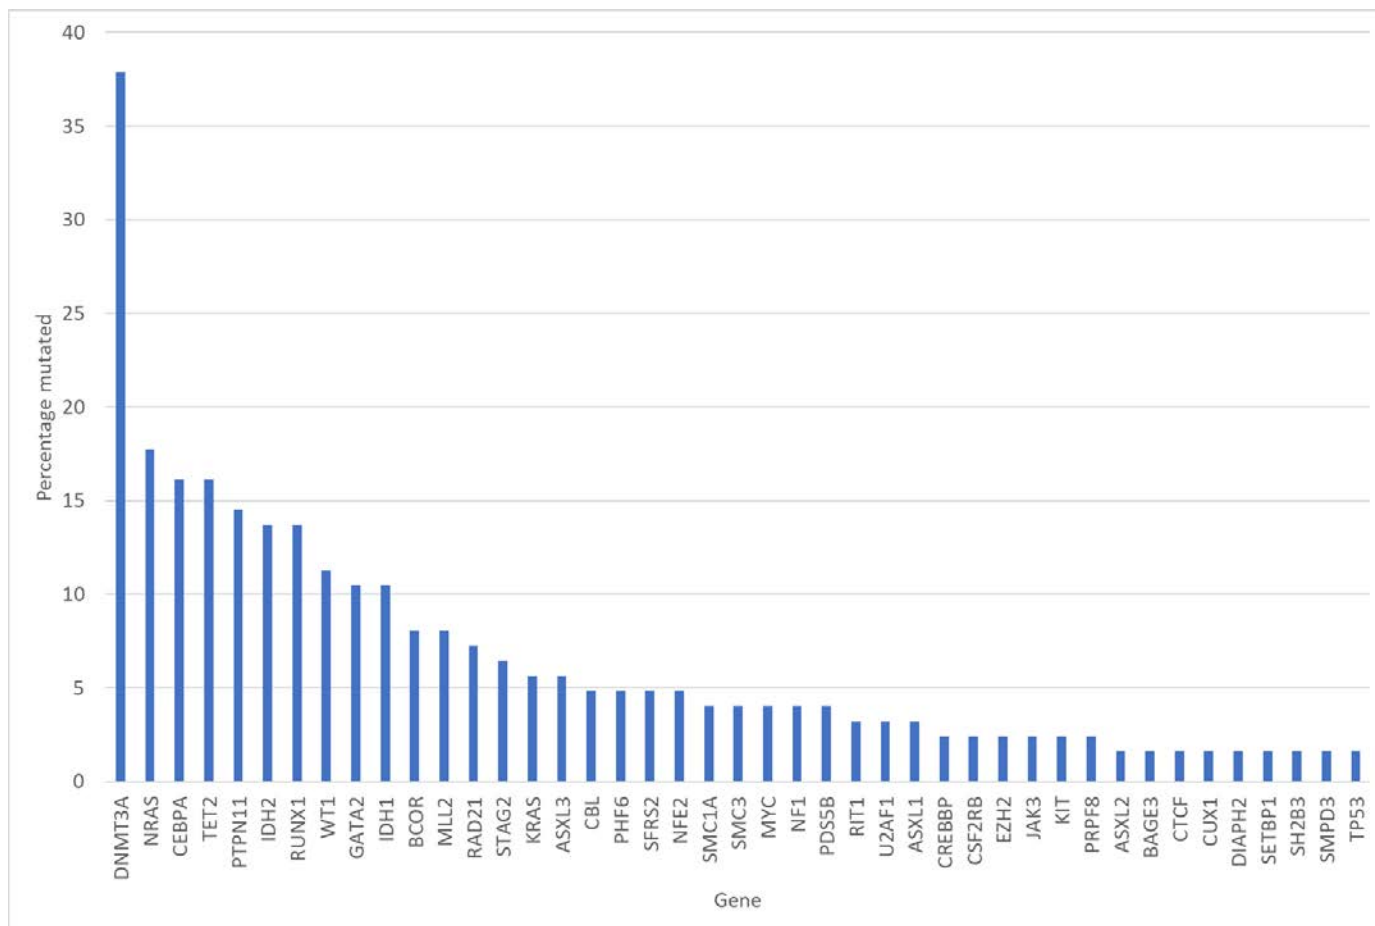

Mutations in the following genes were found in only one patient and are not shown in the graph:

|              |              |                 |              |              |
|--------------|--------------|-----------------|--------------|--------------|
| <b>ATRX</b>  | <b>ERCC2</b> | <b>KIAA1267</b> | <b>PTEN</b>  | <b>SMG1</b>  |
| <b>CBFB</b>  | <b>FBXW7</b> | <b>LUC7L2</b>   | <b>PTPRF</b> | <b>STAG1</b> |
| <b>CBLB</b>  | <b>GATA1</b> | <b>MED12</b>    | <b>SF1</b>   | <b>U2AF2</b> |
| <b>CBLC</b>  | <b>KDM6A</b> | <b>MYH11</b>    | <b>SF3B1</b> | <b>ZRSR2</b> |
| <b>CSF3R</b> |              |                 |              |              |

**Supplementary Figure 4: Stratified analysis of Relapse Free Survival. A) Demographics; B) Mutation status (minimum 10 mutant patients with RFS data)**

**A)**

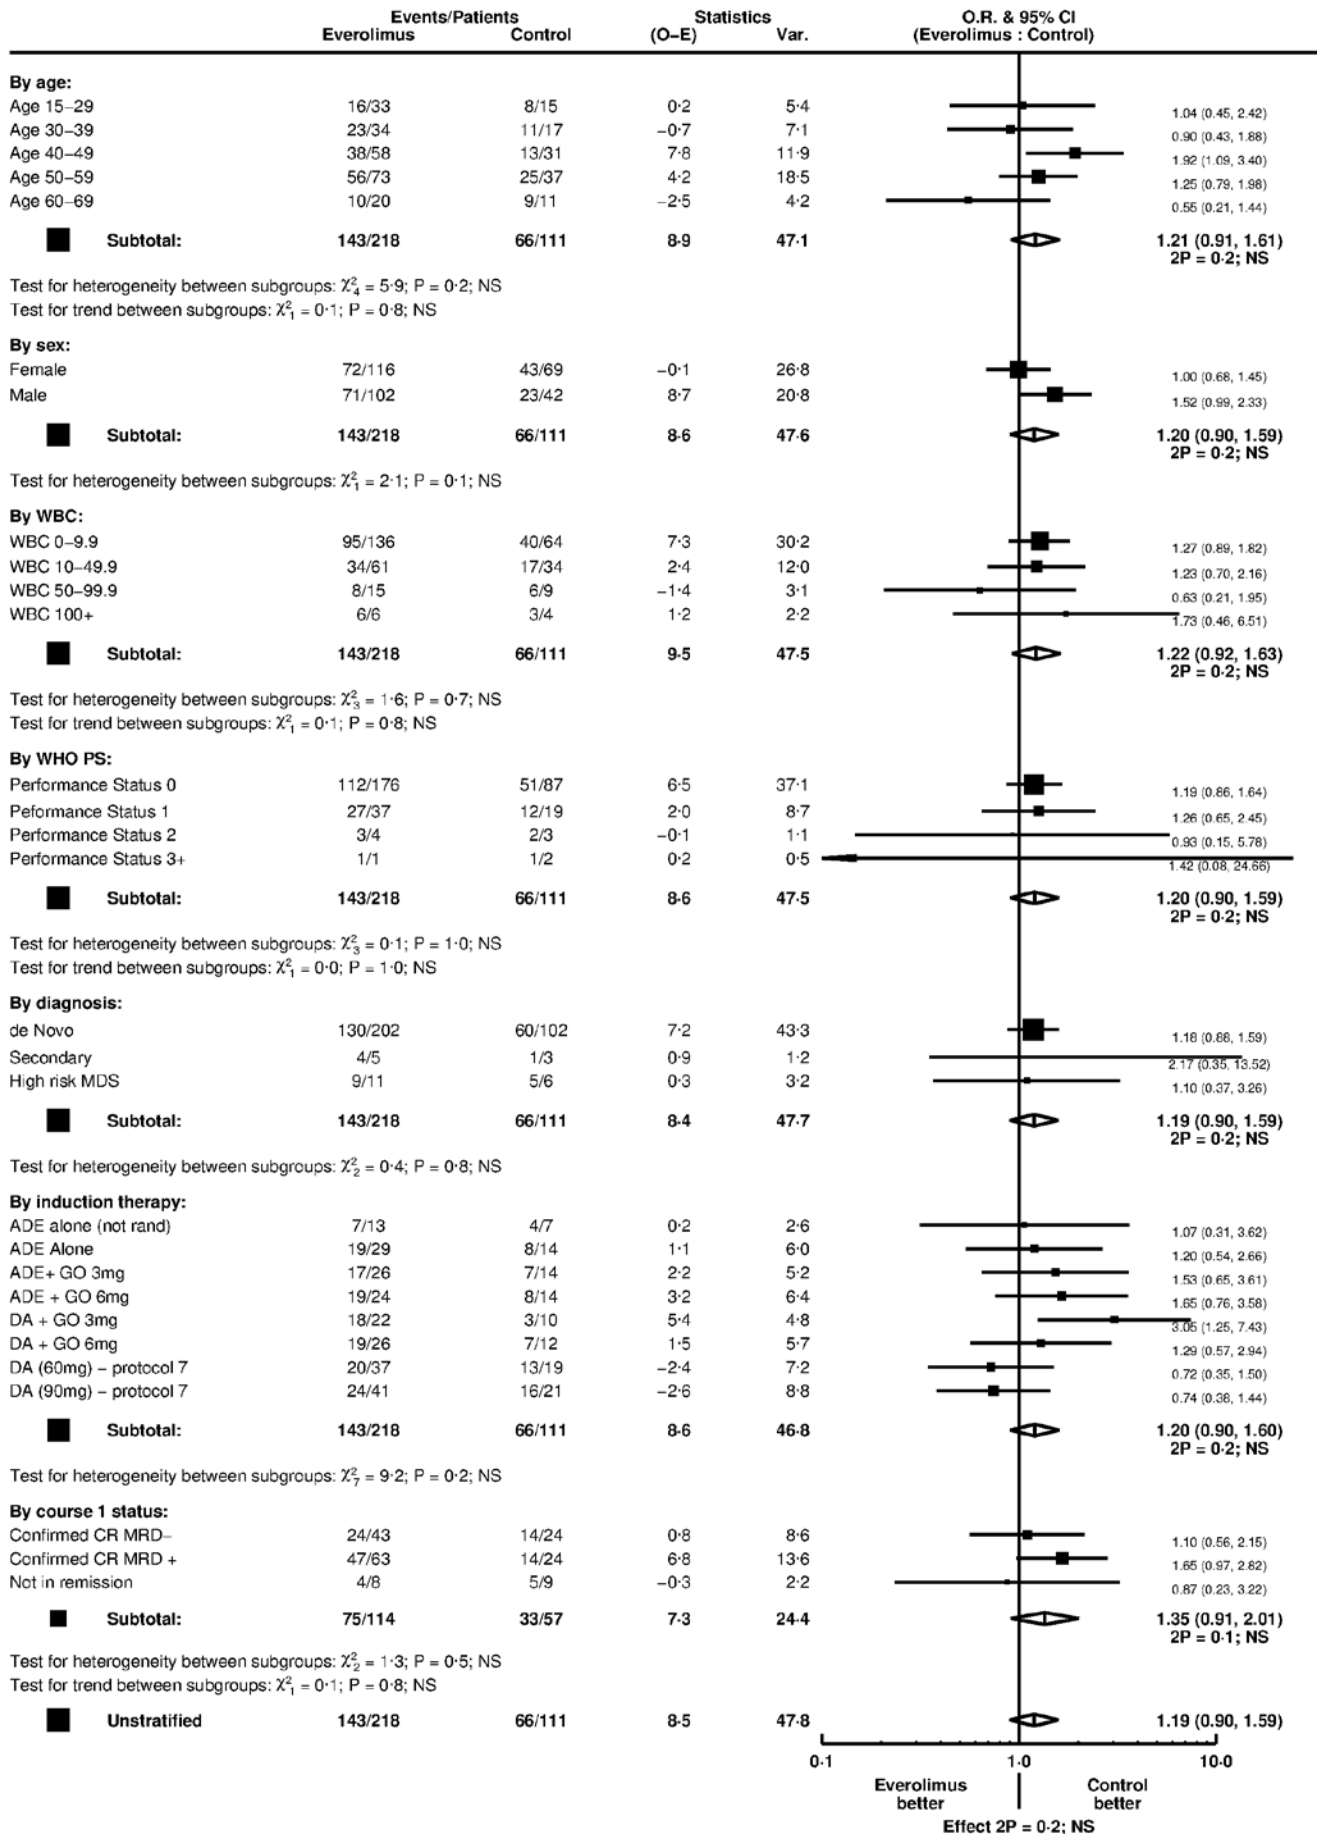

B)

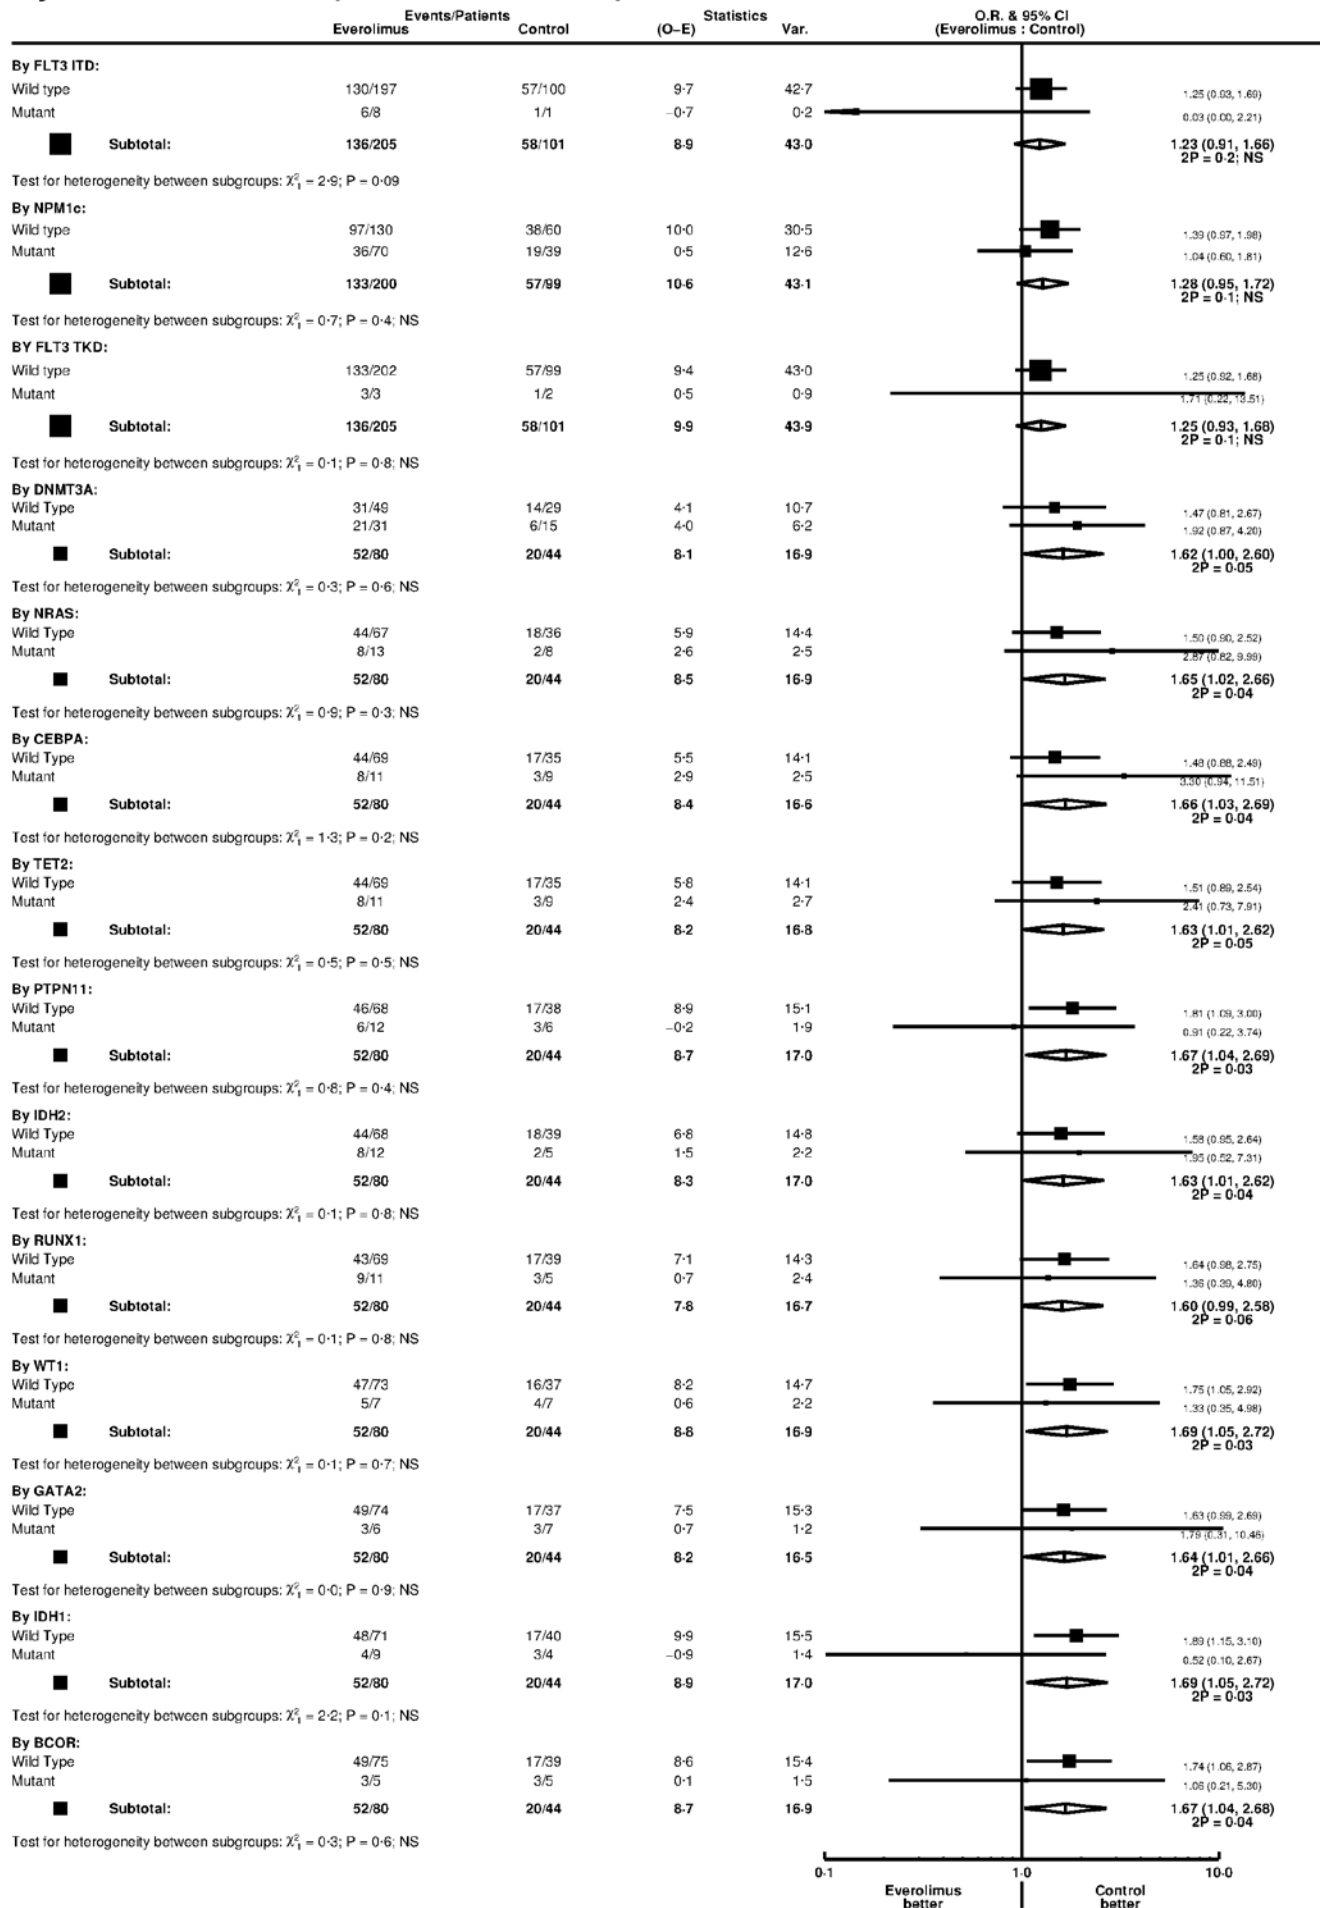

**Supplementary Figure 5: Relapse Free Survival Related to Treatment Compliance. Events within 30 days of course 3 are excluded**

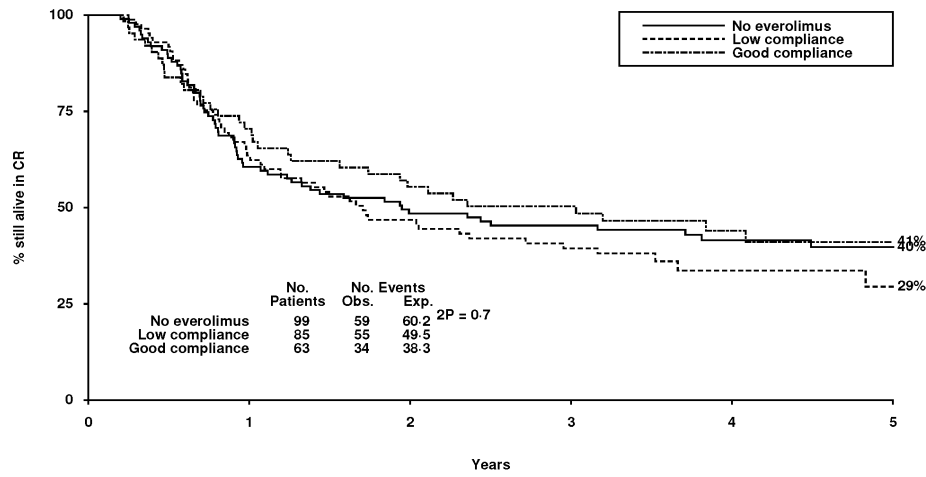

| At risk:        | 0  | 1  | 2  | 3  | 4  | 5  |
|-----------------|----|----|----|----|----|----|
| No everolimus   | 99 | 60 | 48 | 41 | 29 | 15 |
| Low compliance  | 85 | 54 | 39 | 31 | 12 | 6  |
| Good compliance | 63 | 42 | 33 | 28 | 15 | 5  |
