# Supplementary material for: Addition of the mammalian target of rapamycin inhibitor, everolimus, to consolidation therapy in acute myeloid leukemia: experience from the UK NCRI AML17 trial
Source: PubMed Central journal article supplement — Haematologica. 2018 Jul 5;103(10):1654–61. doi: 10.3324/haematol.2018.189514 (PMC6165825; doi:10.3324/haematol.2018.189514), 2018-10
Supplement: HAEMATOL-2018-189514v3-Burnett-01.pdf [file HAEMATOL-2018-189514v3-Burnett-01.pdf]

# A randomized controlled trial testing the addition of mTOR inhibitor everolimus to post-induction chemotherapy in adult patients with acute myeloid leukemia

332 patients with acute myeloid leukemia in remission

220 Everolimus 112 Control

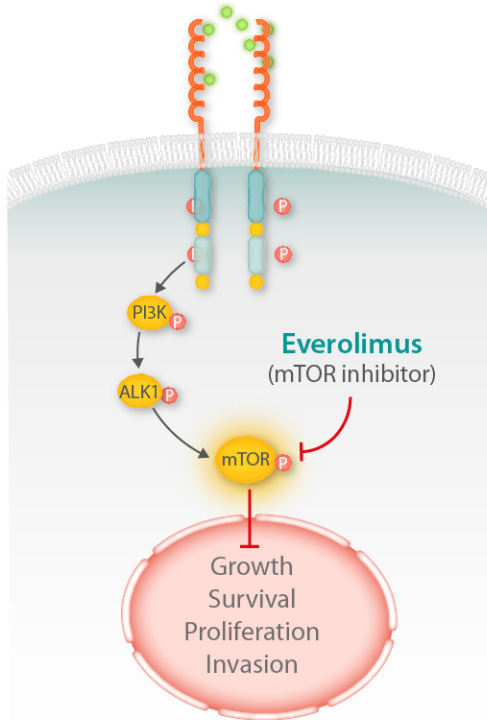

AML stem cell

|                                        | Everolimus                | Control                   |                |
|----------------------------------------|---------------------------|---------------------------|----------------|
| Median age                             | 47 years<br>(range 16-69) | 46 years<br>(range 17-66) |                |
| 30-day mortality                       | 4%                        | 1%                        | <b>p=0.15</b>  |
| 5 year overall survival                | 44%                       | 58%                       | <b>p=0.11</b>  |
| 5 year relapse-free survival           | 29%                       | 40%                       | <b>p=0.2</b>   |
| 5 year cumulative incidence of relapse | 60%                       | 54%                       | <b>p=0.5</b>   |
| 6 month death in CR                    | 8%                        | 1%                        | <b>p=0.009</b> |

**The addition of mTOR inhibitor to post-induction chemotherapy is not beneficial despite the pre-clinical in vitro and in vivo rationale for its use**
